# Supplementary figures and images for: Corrosion protection of aluminum alloy (AA2219-T6) using sulfonic acid-doped conducting polymer coatings
Source: Royal Society of Chemistry journal article supplement (doi:10.1039/d2nj02219b), 2022-01-01

### Supplementary Data

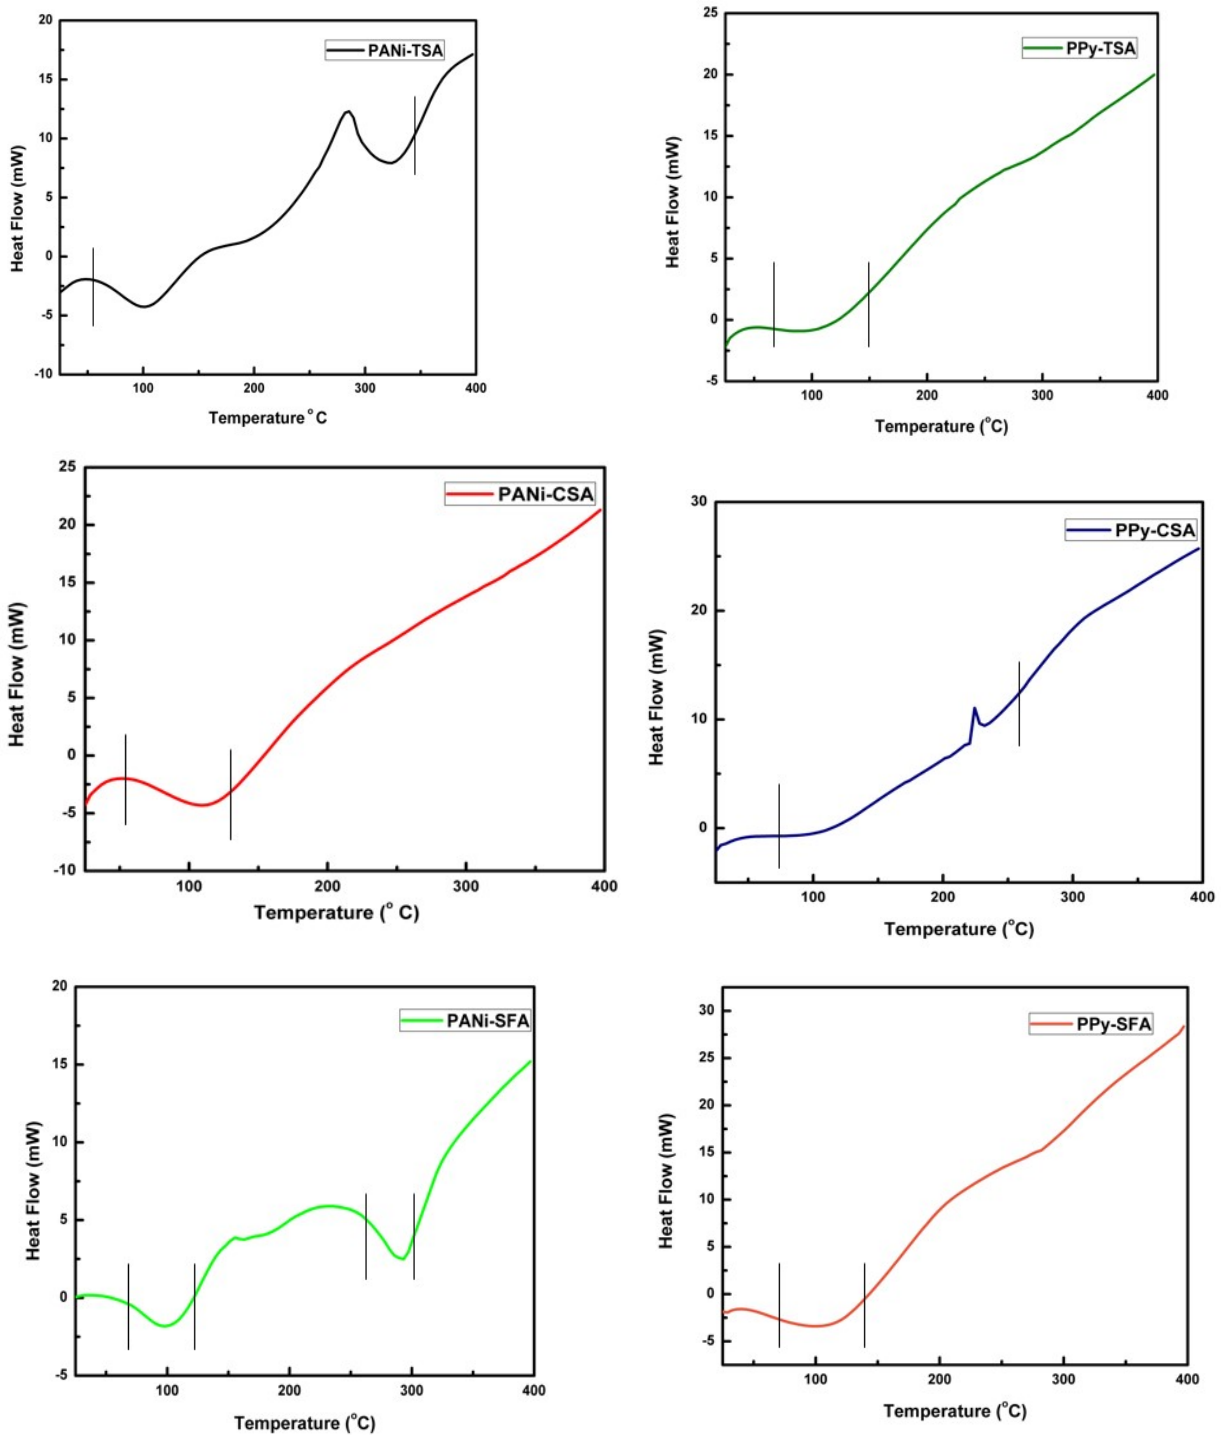

**Fig.1S.** The DSC curves of sulphonate doped CPs.

Supplement: d2nj02219b1.pdf [file d2nj02219b1.pdf]
